# Supplementary material for: Efficient synthesis of photoresponsive azobenzene-containing side-chain liquid crystalline polymers with high molecular weights by click chemistry
Source: Royal Society of Chemistry journal article supplement (doi:10.1039/c0py00138d), 2010-01-01
Supplement: c0py00138d.pdf [file c0py00138d.pdf]

*Supporting Information*

Efficient synthesis of photoresponsive azobenzene-containing side-chain liquid crystalline polymers with high molecular weights by copper(I)- catalyzed polymer analogous click chemistry

Zhibin Li, Ying Zhang, Lirong Zhu, Tao Shen and Huiqi Zhang\*

*Key Laboratory of Functional Polymer Materials (Nankai University), Ministry of Education,*

*Department of Chemistry, Nankai University, Tianjin 300071, P. R. China*

*Tel/Fax: +86-2223507193; E-mail: zhanghuiqi@nankai.edu.cn*

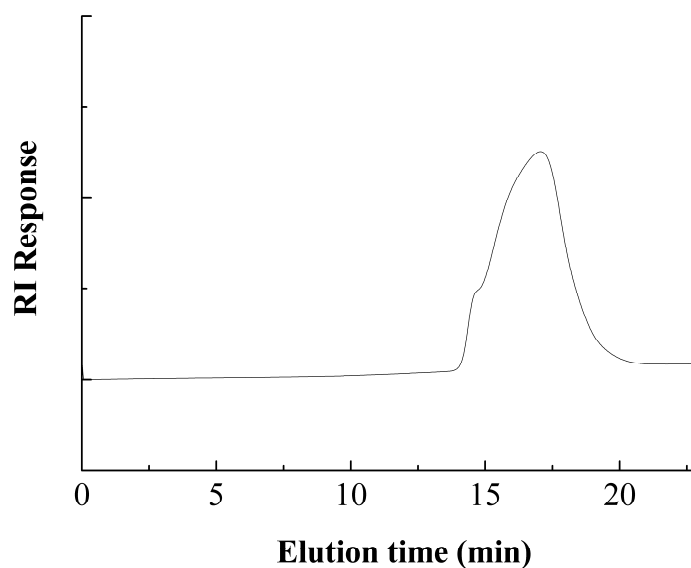

**Fig. S1** SEC chromatogram of poly(PgMA) with THF as the eluent.

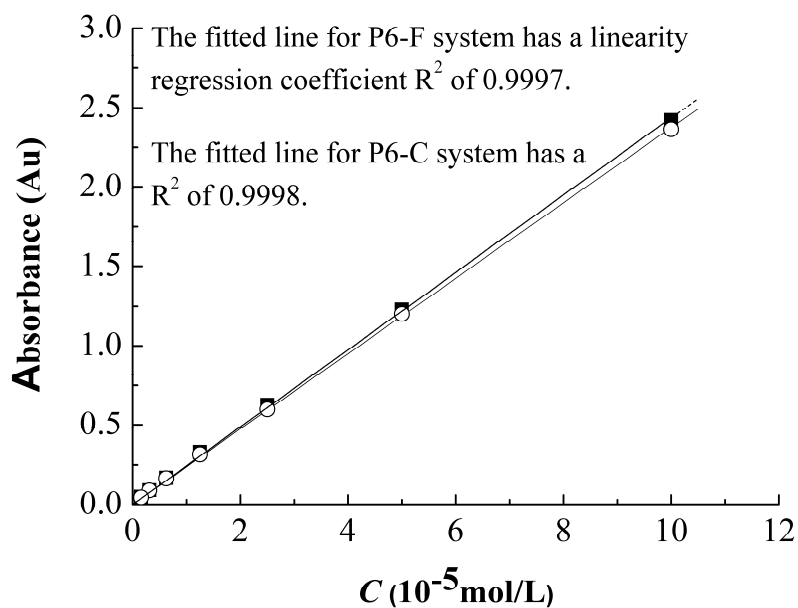

**Fig. S2** Dependence of UV absorbance at 380 nm on polymer concentrations for the solutions of P6-F (filled square) and P6-C (empty circle) in DMF ( $C = 0.156 \times 10^{-5} \sim 10 \times 10^{-5}$  mol/L azo mesogens) at 25 °C.

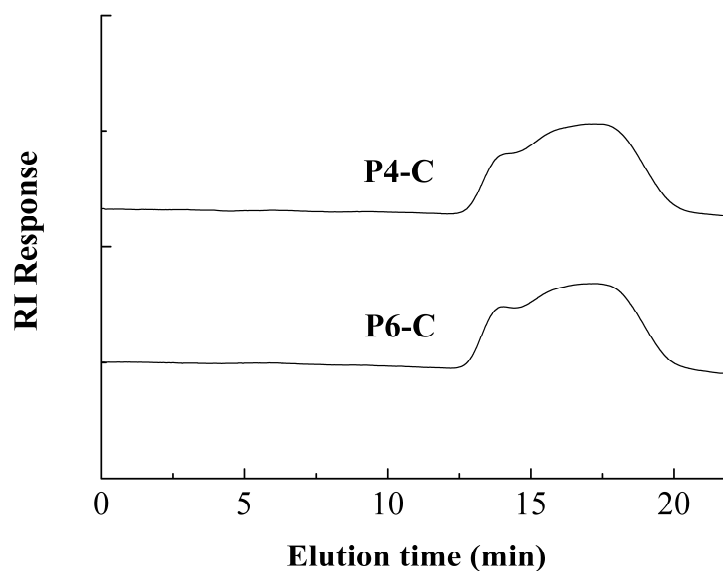

**Fig. S3** SEC chromatograms of P4-C and P6-C with DMF containing 0.5 wt% LiBr as the eluent.
